# Supplementary material for: A colorimetric and fluorescent probe for fluoride anions based on a phenanthroimidazole–cyanine platform
Source: Royal Society of Chemistry journal article supplement (doi:10.1039/c3ay26461k), 2013-01-01
Supplement: c3ay26461k.pdf [file c3ay26461k.pdf]

## Electronic Supplementary Data

Copy of  $^1\text{H}$  NMR,  $^{13}\text{C}$  NMR, HRMS and IR spectra for products:

### 2, 3, 3-trimethyl-3H-indol (1)

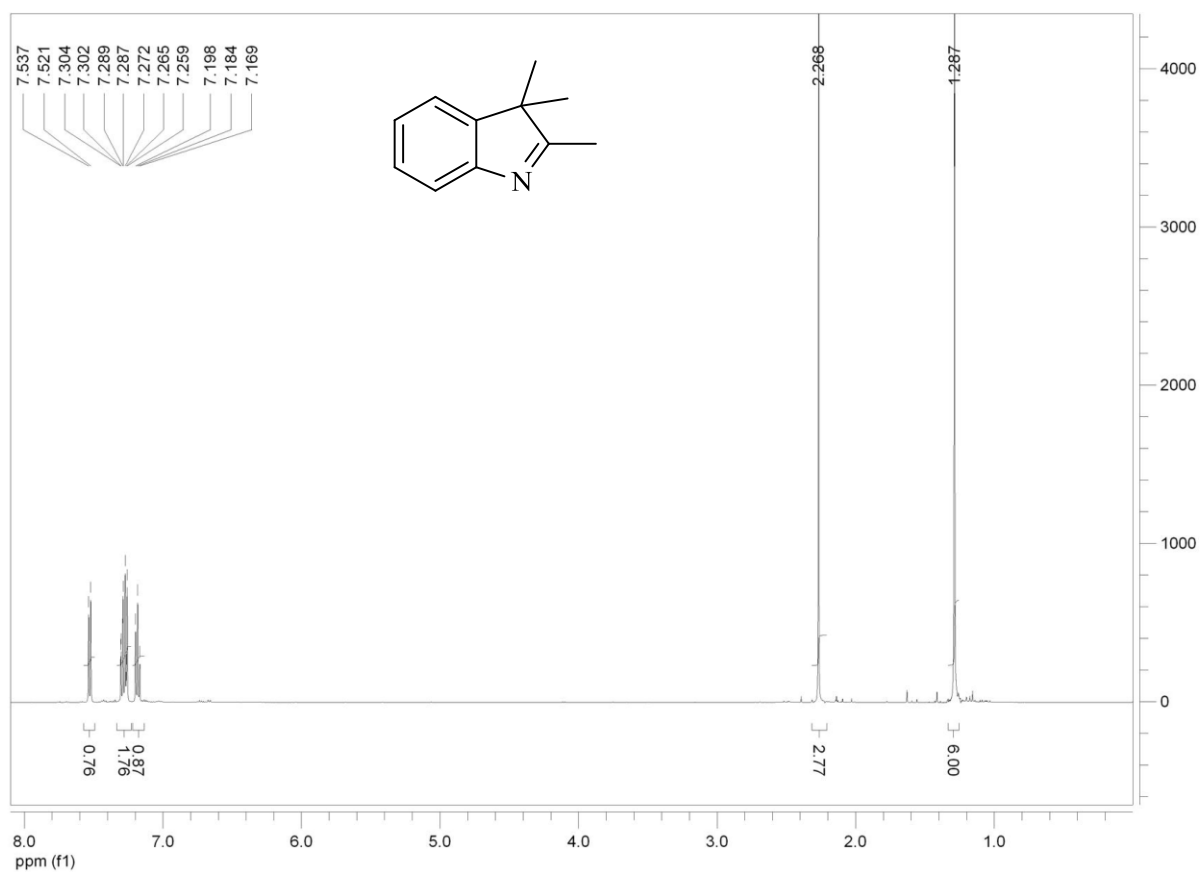

## 1, 2, 3, 3-tetramethyl-3H-indolium iodide (2)

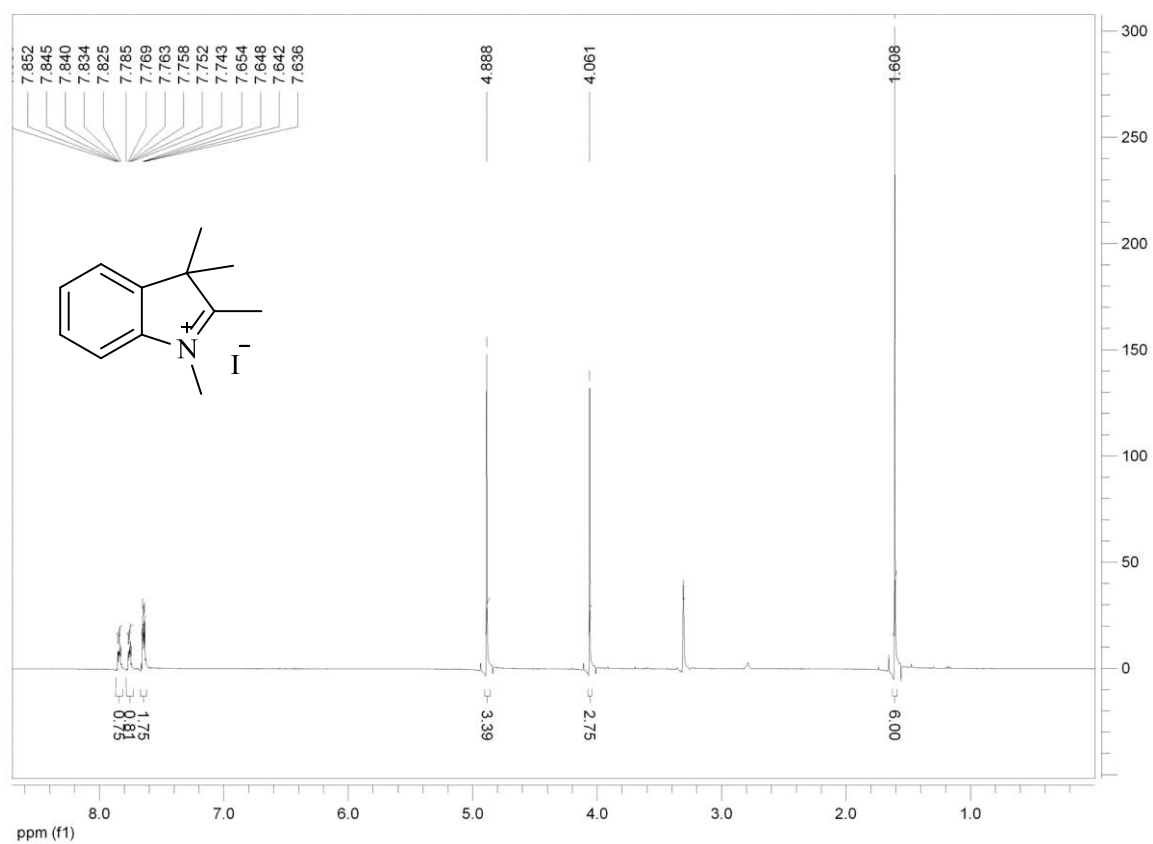

## 2-(4-formylphenyl)phenanthroimidazole (3)

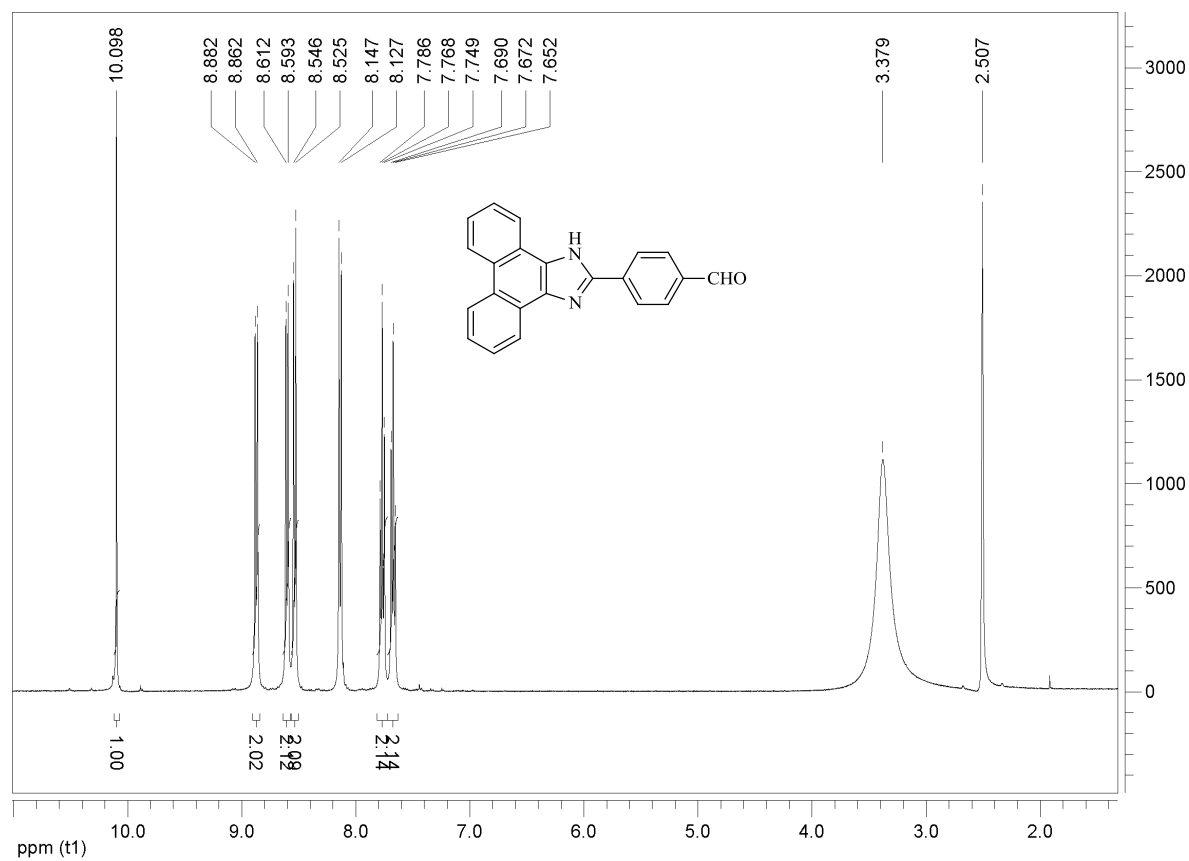

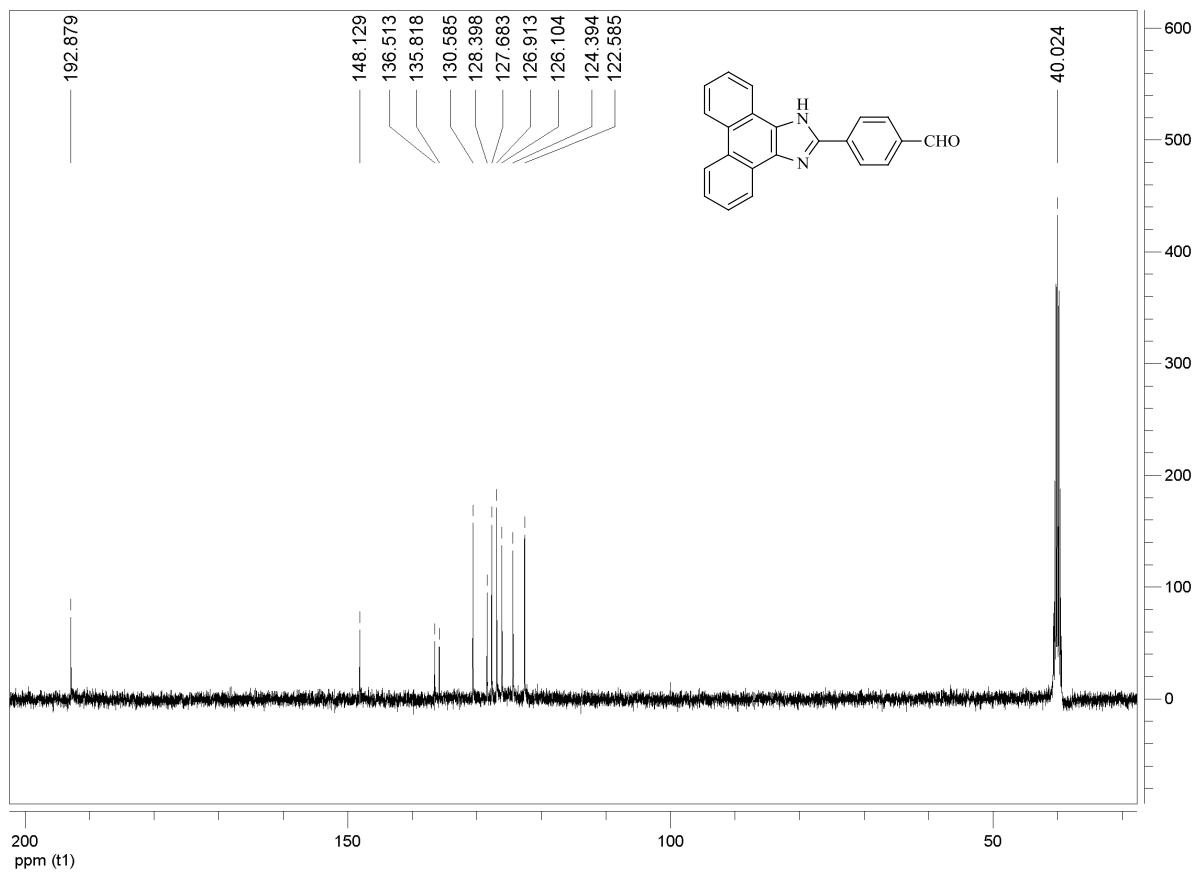

## Display Report

### Analysis Info

Analysis Name

Method tune\_low.m

Sample Name IFR-4

Comment

Acquisition Date 23/8/2011 11:01:36

Operator TJU

Instrument micrOTOF-Q II 10204

### Acquisition Parameter

Source Type

ESI

Ion Polarity

Positive

Set Nebulizer

0.8 Bar

Focus

Not active

Set Capillary

4500 V

Set Dry Heater

180 °C

Scan Begin

50 m/z

Set End Plate Offset

-500 V

Set Dry Gas

6.0 l/min

Scan End

1000 m/z

Set Collision Cell RF

150.0 Vpp

Set Divert Valve

Source

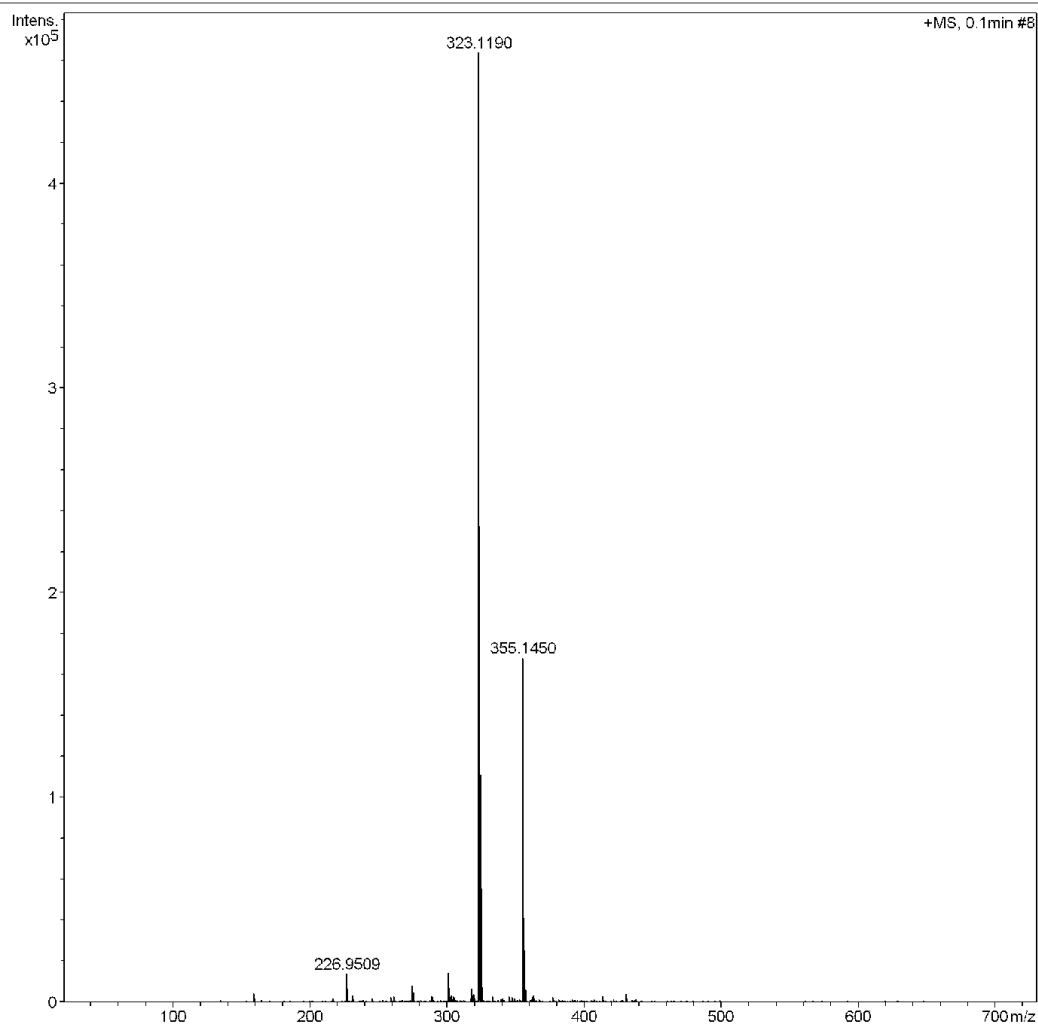

### Compound (4)

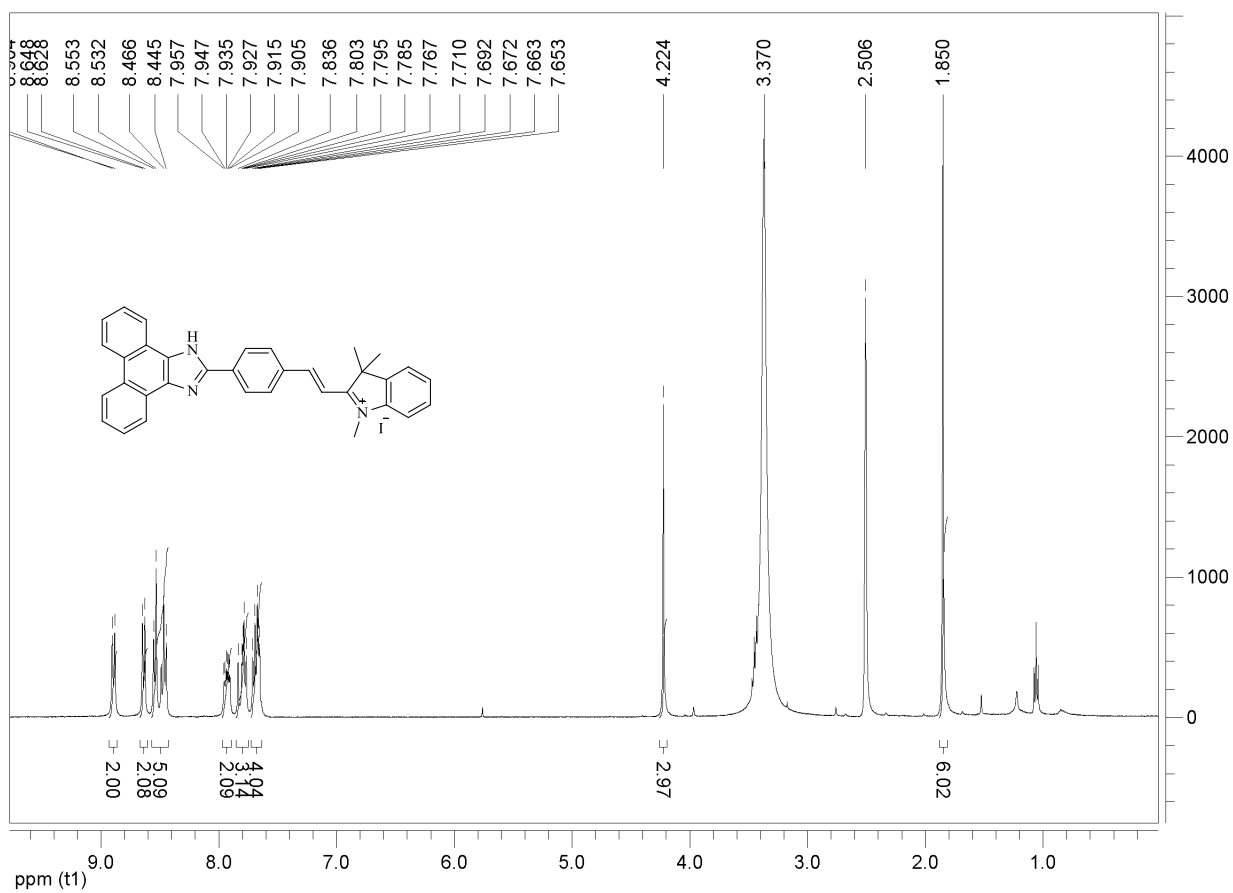

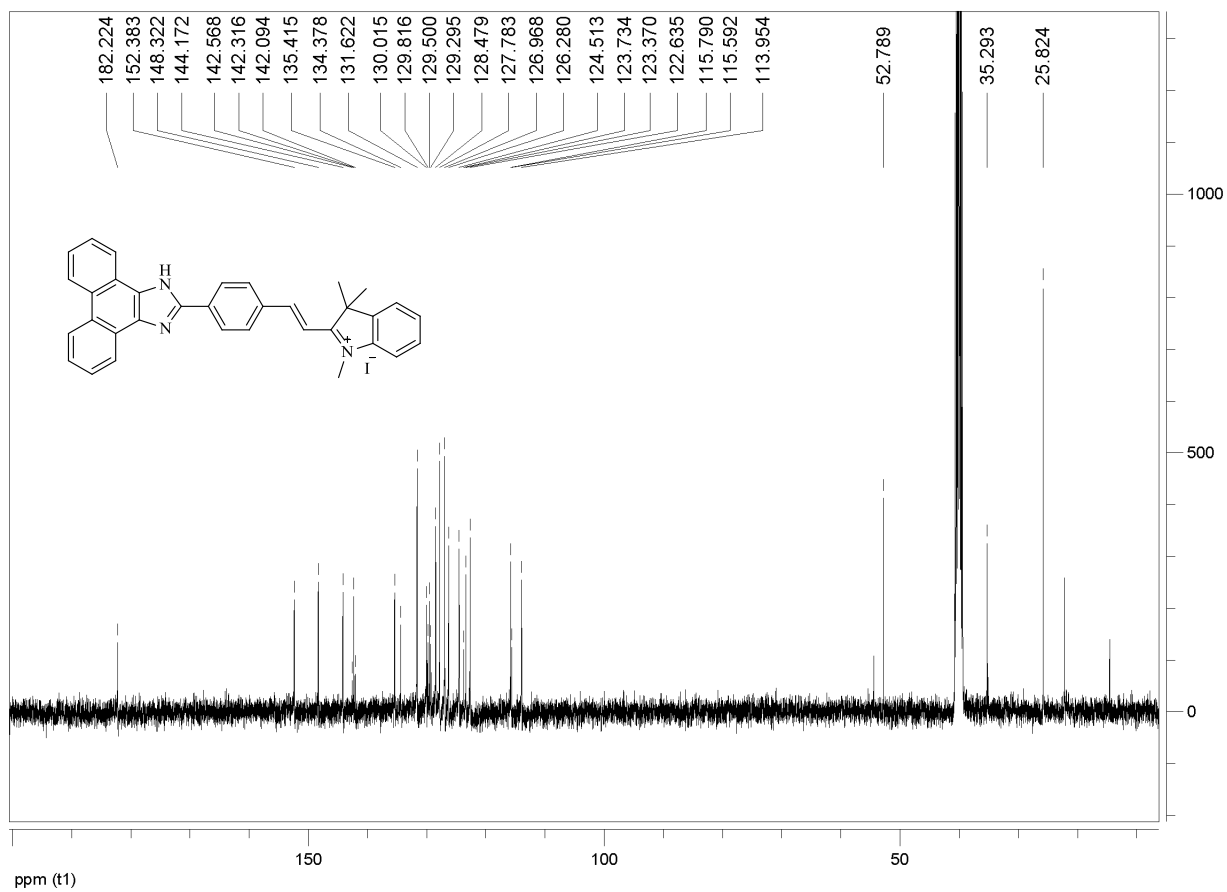

## Display Report

### Analysis Info

Analysis Name D:\Data\Chen Li Gong\20120620-LTT-049.d  
Method tune\_low.m  
Sample Name 20120618-1M-2814.4.5.2828  
Comment

Acquisition Date 6/20/2012 6:20:56 PM

Operator TJU  
Instrument micrOTOF-Q II 10204

### Acquisition Parameter

|             |            |                       |           |                  |           |
|-------------|------------|-----------------------|-----------|------------------|-----------|
| Source Type | APCI       | Ion Polarity          | Positive  | Set Nebulizer    | 1.6 Bar   |
| Focus       | Not active | Set Capillary         | 4500 V    | Set Dry Heater   | 200 °C    |
| Scan Begin  | 50 m/z     | Set End Plate Offset  | -500 V    | Set Dry Gas      | 8.0 l/min |
| Scan End    | 1000 m/z   | Set Collision Cell RF | 150.0 Vpp | Set Divert Valve | Source    |

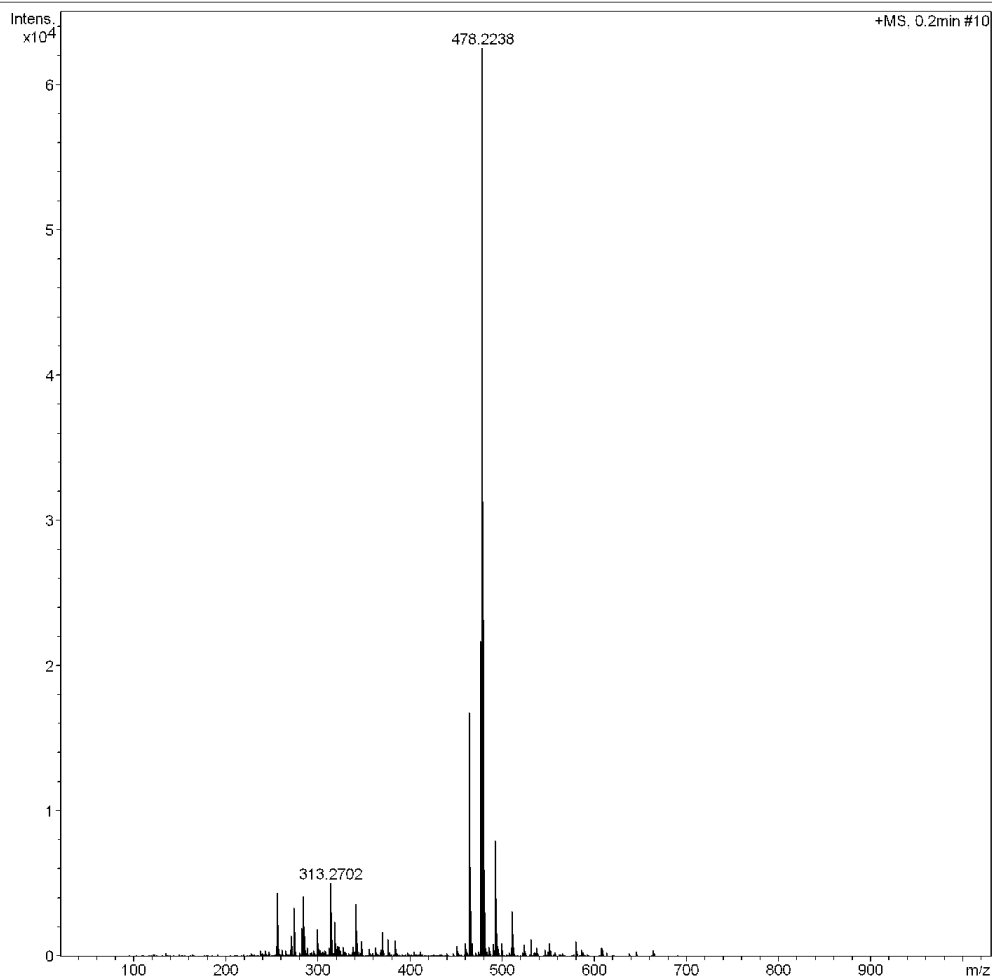



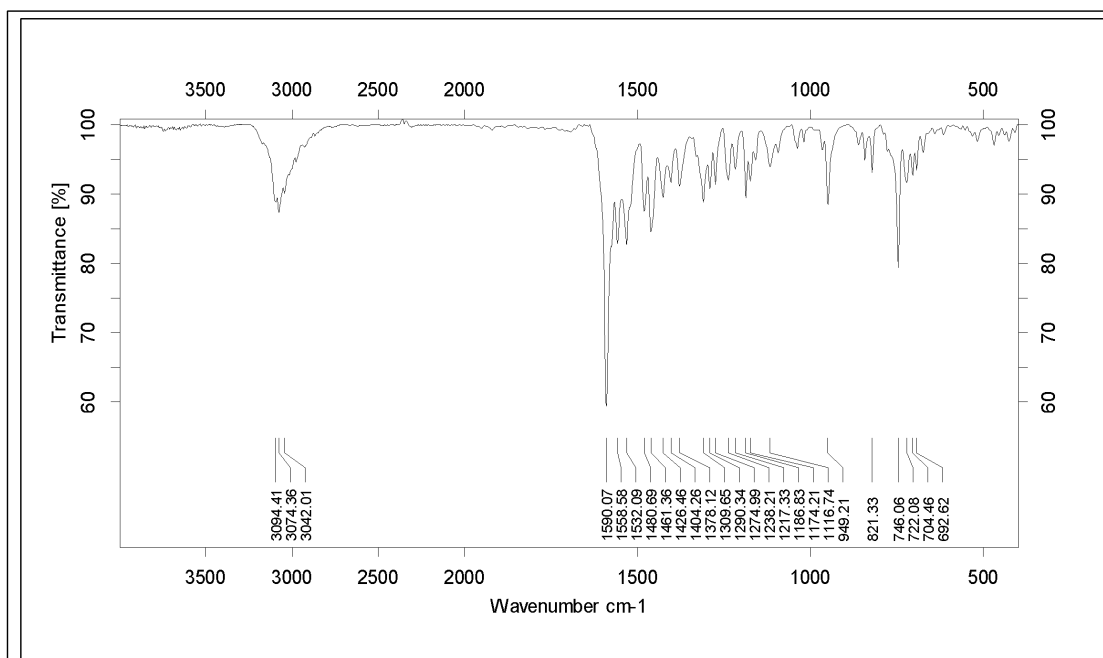

|                     |                                     |                          |
|---------------------|-------------------------------------|--------------------------|
| Sample :            | Frequency Range : 3996.44 - 399.258 | Measured on : 19/06/2012 |
| Technique :         | Resolution : 4                      | Instrument : TENSOR 27   |
| Customer : Operator | Zerofilling : 2                     | Sample Scans : 16        |
|                     | Acquisition : Double Sided,For      |                          |
